# Supplementary material
Source: PubMed Central journal article supplement (PMC4787614)
Supplement: NIHMS755431-supplement-supplement_1.pdf [file NIHMS755431-supplement-supplement_1.pdf]

**Supplemental Table 1. Results of Multivariable Linear Regressions Examining the association of increasing MetS criteria on affect and cognition when considering a diagnosis of Type 2 diabetes as a MetS criterion regardless of glucose levels.**

| Variables                          | Affect                   |                           | Cognition <sup>‡</sup> |                |
|------------------------------------|--------------------------|---------------------------|------------------------|----------------|
|                                    | CES-D<br>B (SE)          | LRN<br>B (SE)             | MEM<br>B (SE)          | ExFx<br>B (SE) |
| <b>African American (vs White)</b> | 0.83 (1.25)              | -0.19 (0.18)              | -0.28 (0.18)           | -0.06 (0.14)   |
| <b>MetS Criteria Met</b>           |                          |                           |                        |                |
| 1or2 vs 0                          | 1.90 (1.11) <sup>T</sup> | -0.27 (0.16) <sup>T</sup> | -0.41 (0.16)**         | -0.17 (0.13)   |
| 3+ vs 0                            | 4.23 (1.16)***           | -0.41 (0.17)*             | -0.49 (0.17)**         | -0.17 (0.14)   |
| 3+ vs 1or2                         | 2.33 (0.90)*             | -0.14 (0.13)              | -0.08 (0.13)           | -0.00 (0.10)   |

NOTE: \*\*\*p<0.001; \*\*p<0.01; \*p<0.05; <sup>T</sup>p>0.05 and p≤0.10;

MetS=Metabolic Syndrome; CES-D=Center for Epidemiologic Studies of Depression; LRN=composite z-score for Learning; MEM=composite z-score for Memory; ExFx=composite z-score for Executive Functioning. All analyses are adjusted for age, race, and pVIQ. ‡Cognitive outcomes were also adjusted for the CES-D.
